# Supplementary material for: DCID-mediated Heck cross-coupling of phenolsviaC–O bond activation
Source: Royal Society of Chemistry journal article supplement (doi:10.1039/d1nj06120h), 2022-01-01
Supplement: d1nj06120h1.pdf [file d1nj06120h1.pdf]

## Supporting Information

### DCID-Mediated Heck Cross-Coupling of Phenols *via* C-O Bond activation

Negin Hosseini,<sup>a</sup> Javad Mokhtari,<sup>\*a</sup> Issa Yavari <sup>a</sup>

<sup>a</sup>*Department of Chemistry, Science and Research Branch, Islamic Azad University, P.O. Box 14515/775, Tehran, Iran. Corresponding author e-mail address: [j.mokhtari@srbiau.ac.ir](mailto:j.mokhtari@srbiau.ac.ir).*

## Dichloroimidazolidinedione (DCID) 2:

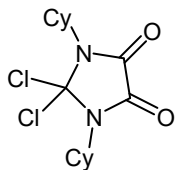

Yield 97%, White solid, m.p =174 -176 °C (lit. [1] mp: 174-176 °C); <sup>1</sup>HNMR (500 MHz, CDCl<sub>3</sub>): δ (ppm) 1.17-1.36 (m, 6H), 1.66- 1.69 (m, 2H), 1.71-1.75 (m, 4H), 1.73-1.87 (m, 4H), 2.02- 2.10 (m, 4H), 3.97- 4.0 (m, 2H).

## 2-chloro-1,3-dicyclohexyl-2-phenoxyimidazolidine-4,5-dione (Ph-OMCID) (3a):

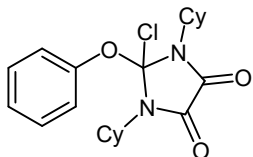

<sup>1</sup>HNMR (500 MHz, CDCl<sub>3</sub>): δ (ppm) 1.15 (m, 4H), 1.18(m, 4H), 1.65 (m, 2H), 1.71 (m, 4H), 1.79 ppm (m, 6H), 3.95 (m, 1H), 6.76 (d, <sup>3</sup>J=7.59, 2H), 6.82 (t, <sup>3</sup>J= 8.14, 2H), 7.16 (t, 3J =7.44, 1H). <sup>13</sup>C-NMR: (125.66 MHz, CDCl<sub>3</sub>) δ 24.41, 28.73, 28.94, 31.87, 114.74, 116.35, 121.22, 128.93, 156.27, 156.79. EI-MS m/z: 393 [M+2]. (lit. [1])

## (E)-Stilbene (5a):

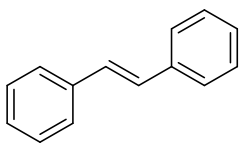

Yield 52 %, white solid, mp 122-124 °C (lit. [2] mp:124-126 °C); <sup>1</sup>H NMR (500 MHz, CDCl<sub>3</sub>): δ (ppm) 7.17 (s, 2H), 7.32 (d, J = 7.4 Hz, 2H), 7.41 (t, J = 7.5 Hz, 4H), 7.57 (d, J = 7.5 Hz, 4H).

**(E)-4-Methylstilbene (5b):**

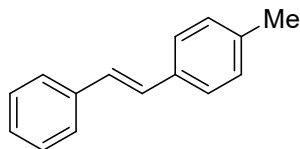

Yield 51 %, white solid, mp 116-118 °C (lit. [2] mp: 120-121 °C); <sup>1</sup>H NMR (500 MHz, CDCl<sub>3</sub>): δ (ppm): 2.40 (s, 3H), 7.08-7.16 (m, 2H), 7.21 (d, J = 7.9 Hz, 2H), 7.29 (t, J = 7.2 Hz 1H), 7.40 (t, J = 7.7 Hz, 2H), 7.46 (d, J = 8.3 Hz, 2H), 7.55 (d, J = 8.3 Hz, 2H).

**(E)-4-Chlorostilbene (5c):**

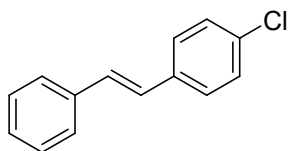

Yield 56%, white solid, mp 127-129 °C (lit. [3] mp: 126-128 °C); <sup>1</sup>H NMR (500 MHz, CDCl<sub>3</sub>): δ (ppm) 7.04-7.14 (m, 2H), 7.28-7.32 (m, 1H), 7.32-7.36 (m, 2H), 7.39 (t, J = 7.7 Hz, 2H), 7.43-7.49 (m, 2H), 7.50-7.56 (m, 2H).

**(E)-4-Methoxostilbene (5d):**

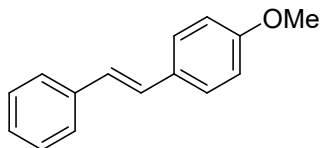

Yield 50%, white solid, mp 130-132 °C (lit. [2] mp: 135-136 °C); <sup>1</sup>H NMR (500 MHz, CDCl<sub>3</sub>): δ (ppm) 3.85 (s, 3H), 6.88-6.94 (m, 2H), 7.00 (d, J = 16.4 Hz, 1H), 7.09 (d, J = 16.4 Hz, 1H), 7.25 (t, J = 7.4 Hz, 1H), 7.37 (t, J = 7.7 Hz, 2H), 7.52-7.46 (m, 4H).

**(E)-3-Chlorostilbene (5e):**

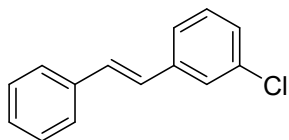

Yield: 52%; white solid; mp: 72-74 °C (lit. [4] mp: 74-76 °C); <sup>1</sup>H NMR (500 MHz, CDCl<sub>3</sub>): δ (ppm) 7.07 (q, J = 16.2 Hz, 2H); 7.26 (t, J = 7.4 Hz, 3H), 7.34-7.40 (m, 3H), 7.51 (d, J = 7.2 Hz, 3H).

**(E)-2-Chlorostilbene (5f):**

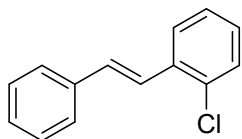

Yield: 51 %; white solid; mp: 60-62 °C (lit. [4] mp: 64-66 °C); <sup>1</sup>H NMR (500 MHz, CDCl<sub>3</sub>): δ (ppm) 7.07 (d, J = 16.0 Hz, 1H), 7.18 (t, J = 7.6 Hz, 1H), 7.31-7.25 (m, 2H), 7.37 (t, J = 7.6 Hz, 3H), 7.53 (m, 3H), 7.68 (d, J = 7.8 Hz, 1H).

**(E)-3-Methylstilbene (5g):**

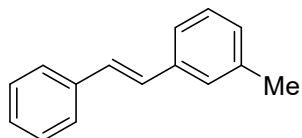

Yield 55 %, white solid, mp 45-47 °C (lit. [4] mp: 48-49 °C); <sup>1</sup>H NMR (500 MHz, CDCl<sub>3</sub>): δ (ppm) 2.41 (s, 3H), 7.09-7.13 (m, 3H), 7.27-7.31 (m, 2H), 7.35-7.40 (m, 4H), 7.56-7.54 (m, 2H).

**(E)-2,4-Dimethylstilbene (5h):**

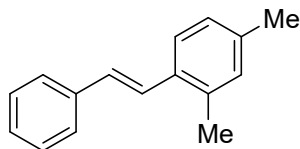

Yield 26 %, white solid, mp 121-124 °C; <sup>1</sup>H NMR (500 MHz, CDCl<sub>3</sub>): δ (ppm) 2.30 (s, 3H), 2.40 (s, 3H), 7.08-7.16 (m, 2H), 7.21 (d, J = 7.9 Hz, 2H), 7.29 (t, J = 7.2 Hz 1H), 7.40 (t, J = 7.7 Hz, 2H), 7.46 (d, J = 8.3 Hz, 1H), 7.55 (d, J = 8.3 Hz, 2H).

**(E)-3-Nitrostilbene (5i):**

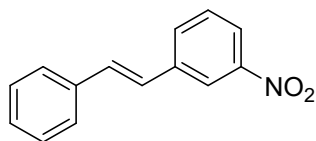

Yield 10 %, off-white solid, mp 102-104 °C; <sup>1</sup>H NMR (500 MHz, CDCl<sub>3</sub>): δ (ppm) 7.16 (d, J = 16.4 Hz, 1H), 7.22 (d, J = 16.4 Hz, 1H), 7.28 (t, J = 7.4 Hz, 1H), 7.40 (t, J = 7.6 Hz, 2H), 7.48 (t, J = 7.7 Hz, 1H), 7.55 (d, J = 7.5 Hz, 2H), 7.73 (d, J = 7.7 Hz, 1H), 7.86 (d, J = 7.7 Hz, 1H), 8.12 (s, 1H).

**(E)-4-Nitrostilbene (5j):**

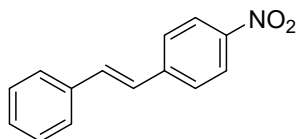

Pale yellow solid, mp 154-156 °C (lit. [5] mp: 157 °C); <sup>1</sup>H NMR (500 MHz, CDCl<sub>3</sub>): δ (ppm) 7.05 (d, J = 16.2 Hz, 1H), 7.20 (d, J = 16.2 Hz, 1H), 7.24 (t, J = 7.2 Hz, 1H), 7.31 (t, J = 7.4 Hz, 2H), 7.46 (d, J = 7.4 Hz, 2H), 7.54 (d, J = 8.6 Hz, 2H), 8.13 (d, J = 8.6 Hz, 2H).

**(E)-4-Chloro-4'-methoxystilbene (5k):**

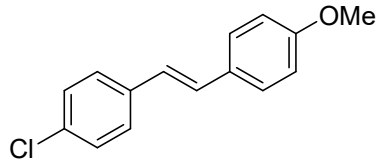

White solid, mp 182-184°C (lit. [6] mp: 181-184°C); <sup>1</sup>H NMR (500 MHz, CDCl<sub>3</sub>): δ (ppm) 2.62 (s, 3H), 7.10 (d, J = 16.4 Hz, 1H), 7.18 (d, J = 16.4 Hz, 1H), 7.36 (d, J = 8.5 Hz, 2H), 7.47 (d, J = 8.5 Hz, 2H), 7.58 (d, J = 8.4 Hz, 2H), 7.97 (d, J = 8.4 Hz, 2H).

**(E)-4'-Methoxy-4-methylstilbene (5l):**

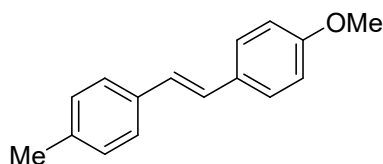

Off white solid, mp 164-166 °C (lit. [7] mp: 166-167 °C); <sup>1</sup>H NMR (500 MHz, CDCl<sub>3</sub>) δ (ppm) 2.62 (s, 3H), 3.86 (s, 3H), 6.93 (d, J = 8.7 Hz, 2H), 7.01 (d, J = 16.3 Hz, 1H), 7.20 (d, J = 16.3 Hz, 1H), 7.50 (d, J = 8.7 Hz, 2H), 7.57 (d, J = 8.3 Hz, 2H), 7.87 (d, J = 8.3 Hz, 2H).

**References**

1. (a) K. Madankar, J. Mokhtari, Z. Mirjafary, *Synlett* **2020**, *31*, 1725-1729. (b) K. Madankar, J. Mokhtari, Z. Mirjafary, *Appl. Organometal. Chem.* **2020**, e5383
2. H. J. Xu, Y. Q. Zhao, X. F. Zhou, *J. Org. Chem.* **2011**, *76*, 8036 -8041.
3. K. Kikukawa, M. Naritomi, G. X. He, F. Wada, T. Matsuda, *J. Org. Chem.* **1985**, *50*, 299-301.

4. J. J. Heynekamp, W. M. Weber, L. A. Hunsaker, A. M. Gonzales, R. A. Orlando, L. M. Deck, D. L. V. Jagt, Substituted trans-Stilbenes, Including Analogues of the Natural Product Resveratrol, Inhibit the Human Tumor Necrosis Factor Alpha-Induced Activation of Transcription Factor Nuclear Factor KappaB, *J. Med. Chem.* **2006**, *49*, 7182–7189.
5. N. Sun, M. Chen, L. Jin, W. Zhao, B. Hu, Z. Shen, X. Hu, An efficient Pd–NHC catalyst system in situ generated from Na<sub>2</sub>PdCl<sub>4</sub> and PEG-functionalized imidazolium salts for Mizoroki–Heck reactions in water, *Beilstein J. Org. Chem.* **2017**, *13*, 1735–1744.
6. L. Botella, C. Najera, Synthesis of methylated resveratrol and analogues by Heck reactions in organic and aqueous solvents. *Tetrahedron* **2004**, *60*, 5563-5570.
7. J. E. Dubois, M. F. Ruasse, Electrophilic bromination of aromatic conjugated olefins. II. Mechanism of the dual-path additions in stilbene bromination. Evidence from multiple substituent effects for carbonium ion intermediates. *J. Org. Chem.* **1973**, *38*, 493-499.
